# Supplementary material for: A prediction tool for plaque progression based on patient-specific multi-physical modeling
Source: PLoS Comput Biol. 2021 Mar 29;17(3):e1008344. doi: 10.1371/journal.pcbi.1008344 (PMC8057612; doi:10.1371/journal.pcbi.1008344)
Supplement: S7 File — (DOCX) [file pcbi.1008344.s007.docx]

S7. The scheme of finite differential methods:

1. *The FTCS scheme*

For the general form of equations (Eq.1), it has four typical terms: the time derivation at left-hand sides, and diffusion, reaction, and production term at the right-hand sides. Hence, we considered the following form:
where , and are diffusion coefficient, reaction rate and production rate, respectively.

We divided a 2-D temporal-spatial region, , into elements and wrote . We used forward time difference and central space difference and obtained the scheme:

1. *Discretization of equation*

We rewrote Eq.1 as:

(S7-1)

where representing in Eq.1, respectively.

We used FTCS method to discretize Eq.(S7-1):

Rearranging it, we obtained:
